# Supplementary material for: Kodo millet whole grain and bran supplementation prevents high-fat diet induced derangements in a lipid profile, inflammatory status and gut bacteria in mice
Source: Royal Society of Chemistry journal article supplement (doi:10.1039/c6fo01467d), 2017-01-01
Supplement: c6fo01467d1.pdf [file c6fo01467d1.pdf]

## **Kodo millet whole grain and bran supplementation prevents high-fat diet induced derangements in lipid profile, inflammatory status and gut bacteria in mice**

**Siddhartha M Sarma<sup>a,e</sup> #, Pragyanshu Khare<sup>a</sup> #, Sneha Jagtap<sup>b</sup>, Dharendra P Singh<sup>a</sup>, Ritesh K Baboota<sup>a</sup>, Koteswariah Podili<sup>c</sup>, Ravneet K Boparai<sup>d</sup>, Jaspreet Kaur<sup>e\*</sup>, Kamlesh K Bhutani<sup>b</sup>, Mahendra Bishnoi<sup>a</sup>, Kanthi Kiran Kondepudi<sup>a\*</sup>**

<sup>a</sup> National Agri-Food Biotechnology Institute, SAS Nagar, Punjab, India

<sup>b</sup> National Institute of Pharmaceutical Education and Research (NIPER), SAS Nagar, Punjab, India

<sup>c</sup> Division of Biomedical Sciences, School of Biosciences and Technology, VIT University, Vellore, Tamil Nadu, India

<sup>d</sup> Department of Biotechnology, Government College for Girls, Sector 42, Chandigarh, India

<sup>e</sup> University Institute of Engineering and Technology, Panjab University, Chandigarh, India

**# These authors contributed equally and are the first authors.**

### **\* Corresponding Authors:**

#### **Kanthi Kiran Kondepudi, PhD**

Scientist - C,

National Agri-Food Biotechnology Institute (NABI),

C-127, Industrial Area, Phase VIII, SAS Nagar, Punjab – 160 071, India

Email: [kiran@nabi.res.in](mailto:kiran@nabi.res.in)

Phone: +91-172-2290128

Fax: +91-172-+91-172-4604888

#### **Jaspreet Kaur, PhD**

Associate Professor,

University Institute of Engineering and Technology (UIET),

Panjab University, Sector 19, Chandigarh, India

Email: [jaspreet\\_virdi@yahoo.com](mailto:jaspreet_virdi@yahoo.com)

| Diet Ingredient                  | Normal diet <sup>a</sup> | High-Fat diet <sup>b</sup> | High-Fat Diet-WG <sup>c</sup> |           | High-Fat Diet-BR <sup>c</sup> |           | Normal Diet + 20% KM |           |
|----------------------------------|--------------------------|----------------------------|-------------------------------|-----------|-------------------------------|-----------|----------------------|-----------|
|                                  |                          |                            | 10%                           | 20%       | 10%                           | 20%       | Whole grain          | Bran      |
| Sucrose                          | 33.13                    | 20.14                      | 14.52                         | 11.21     | 14.52                         | 11.21     | 26.50                | 26.50     |
| Dextrin                          | 29.86                    | 8.48                       | 8.06                          | 5.08      | 8.06                          | 5.08      | 23.88                | 23.88     |
| Casein                           | 18.96                    | 23.31                      | 21.40                         | 19.50     | 21.40                         | 19.50     | 15.16                | 15.16     |
| Cellulose                        | 4.74                     | 5.83                       | 5.35                          | 4.88      | 5.35                          | 4.88      | 3.79                 | 3.79      |
| Maltodextrin                     | 3.32                     | 11.65                      | 11.07                         | 10.74     | 11.07                         | 10.74     | 2.65                 | 2.65      |
| Soyabean Oil                     | 2.37                     | 2.91                       | 2.68                          | 2.44      | 2.68                          | 2.44      | 1.90                 | 1.90      |
| Lard                             | 1.90                     | 20.68                      | 20.46                         | 20.27     | 20.46                         | 20.27     | 1.52                 | 1.52      |
| Potassium Citrate                | 1.56                     | 1.92                       | 1.77                          | 1.61      | 1.77                          | 1.61      | 1.25                 | 1.25      |
| Calcium Phosphate                | 1.23                     | 1.52                       | 1.39                          | 1.27      | 1.39                          | 1.27      | 0.99                 | 0.99      |
| DIO Mineral Mix                  | 0.95                     | 1.17                       | 1.07                          | 0.98      | 1.07                          | 0.98      | 0.76                 | 0.76      |
| AIN-76A Vitamin Mix              | 0.95                     | 1.17                       | 1.07                          | 0.98      | 1.07                          | 0.98      | 0.76                 | 0.76      |
| Calcium Carbonate                | 0.52                     | 0.64                       | 0.59                          | 0.54      | 0.59                          | 0.54      | 0.42                 | 0.42      |
| L-Cystine                        | 0.28                     | 0.35                       | 0.32                          | 0.29      | 0.32                          | 0.29      | 0.23                 | 0.23      |
| Choline Bitartrate               | 0.19                     | 0.23                       | 0.21                          | 0.19      | 0.21                          | 0.19      | 0.15                 | 0.15      |
| <b>Total</b>                     | <b>100</b>               | <b>100</b>                 | <b>90</b>                     | <b>80</b> | <b>90</b>                     | <b>80</b> | <b>80</b>            | <b>80</b> |
| KM Whole grain                   | 0                        | 0                          | <b>10</b>                     | <b>20</b> | 0                             | 0         | 20                   | 0         |
| KM-Bran                          | 0                        | 0                          | 0                             | 0         | <b>10</b>                     | <b>20</b> | 0                    | <b>20</b> |
| <b>% Energy and their source</b> |                          |                            |                               |           |                               |           |                      |           |
| Protein                          | 20.0                     | 20.0                       | 18.9                          | 17.7      | 18.8                          | 17.7      | 17.2                 | 17.2      |
| Fat                              | 10.1                     | 45.5                       | 45.4                          | 45.0      | 45.3                          | 45.2      | 9.4                  | 9.5       |
| Carbohydrate                     | 69.9                     | 34.5                       | 35.9                          | 37.2      | 35.8                          | 37.1      | 73.5                 | 73.4      |
| Total                            | 100                      | 100                        | 100                           | 100       | 100                           | 100       | 100                  | 100       |

**Electronic supplementary information 1:** <sup>a</sup> Normal diet (ND) was based on DIO rodent purified diet w/~10% energy from fat from “TestDiet No. 58124” (TestDiet, St. Louis, USA).

<sup>b</sup> High-fat diet (HFD) was based on DIO rodent purified diet w/45% energy from fat from “TestDiet No. 58125” (TestDiet, St. Louis, USA).

<sup>c</sup> KM-WG/BR supplemented diets were prepared based on HFD composition (~45% energy from fat) while considering energy derived from fat + KM components (as per online resource 1).

<sup>d</sup> ND-20%WG and ND-20%BR supplemented diets were prepared based on NPD composition (~10% energy from fat) while considering energy derived from fat + KM components (as per online resource 1).
