# Supplementary material for: Kodo millet whole grain and bran supplementation prevents high-fat diet induced derangements in a lipid profile, inflammatory status and gut bacteria in mice
Source: Royal Society of Chemistry journal article supplement (doi:10.1039/c6fo01467d), 2017-01-01
Supplement: c6fo01467d2.pdf [file c6fo01467d2.pdf]

## **Kodo millet whole grain and bran supplementation prevents high-fat diet induced derangements in lipid profile, inflammatory status and gut bacteria in mice**

**Siddhartha M Sarma<sup>a,e</sup> #, Pragyanshu Khare<sup>a</sup> #, Sneha Jagtap<sup>b</sup>, Dharendra P Singh<sup>a</sup>, Ritesh K Baboota<sup>a</sup>, Koteswariah Podili<sup>c</sup>, Ravneet K Boparai<sup>d</sup>, Jaspreet Kaur<sup>e\*</sup>, Kamlesh K Bhutani<sup>b</sup>, Mahendra Bishnoi<sup>a</sup>, Kanthi Kiran Kondepudi<sup>a\*</sup>**

<sup>a</sup> National Agri-Food Biotechnology Institute, SAS Nagar, Punjab, India

<sup>b</sup> National Institute of Pharmaceutical Education and Research (NIPER), SAS Nagar, Punjab, India

<sup>c</sup> Division of Biomedical Sciences, School of Biosciences and Technology, VIT University, Vellore, Tamil Nadu, India

<sup>d</sup> Department of Biotechnology, Government College for Girls, Sector 42, Chandigarh, India

<sup>e</sup> University Institute of Engineering and Technology, Panjab University, Chandigarh, India

**# These authors contributed equally and are the first authors.**

### **\* Corresponding Authors:**

**Kanthi Kiran Kondepudi, PhD**

Scientist - C,

National Agri-Food Biotechnology Institute (NABI),

C-127, Industrial Area, Phase VIII, SAS Nagar, Punjab – 160 071, India

Email: [kiran@nabi.res.in](mailto:kiran@nabi.res.in)

Phone: +91-172-2290128

Fax: +91-172-+91-172-4604888

**Jaspreet Kaur, PhD**

Associate Professor,

University Institute of Engineering and Technology (UIET),

Panjab University, Sector 19, Chandigarh, India

Email: [jaspreet\\_virdi@yahoo.com](mailto:jaspreet_virdi@yahoo.com)

## Electronic supplementary information 2: List of qRT-PCR primers

| Primer                | Forward sequence           | Reverse sequence          |
|-----------------------|----------------------------|---------------------------|
| <i>β actin</i>        | TGTTACCAACTGGGACGACA       | GGGGTGTGAAGGTCTCAA        |
| <i>GAPDH</i>          | AAGGGCTCATGACCACAGTC       | CACATTGGGGGTAGGAACAC      |
| <i>ACC</i>            | CAGAACATGTGGGTGTCCAG       | GGGCGTTCTTTGAAATACCA      |
| <i>NFκB</i>           | GAGGTCTCTGGGGTACCAT        | TTGCGGAAGGATGTCTCCAC      |
| <i>F4/80</i>          | TCTGGGGAGCTTACGATGGA       | GAATCCCGCAATGATGGCAC      |
| <i>MCP1</i>           | TGGCTGTGTTTGCCTCTCTA       | CCTACAGGAAACAGGGTGT       |
| <i>HSL</i>            | GAGGCCTTTGAGATGCCACT       | GCCAGGCTGTTGAGTACCTT      |
| <i>PPARγ</i>          | GCCAAGGTGCTCCAGAAGAT       | CTTTGTCAGCGACTGGGACT      |
| <i>C/EBP α</i>        | CCAGTGACAATGACCGCCT        | CGACCCATAACCATCCTCCG      |
| <i>Total Bacteria</i> | ACTCCTACGGGAGGCAGCAGT      | ATTACCGCGGCTGCTGGC        |
| <i>Akkermansia</i>    | CAG CAC GTG AAG GTG GGG AC | CCT TGC GGT TGG CTT CAGAT |
| <i>Bacteroidetes</i>  | ACGCTAGCTACAGGCTTAACA      | ACGCTACTTGGCTGGTTCA       |
| <i>Firmicutes</i>     | GCGTGAGTGAAGAAGT           | CTACGCTCCCTTTACAC         |
| <i>Roseburia spp.</i> | GCGGTRCGGCAAGTCTGA         | CCTCCGACACTCTAGTMCGA      |
| <i>Bifidobacteria</i> | TCGCGTCYGGTGTGAAAG         | CCACATCCAGCRTCCAC         |
| <i>Lactobacillus</i>  | CACCGCTACACATGGAG          | AGCAGTAGGGAATCTTCCA       |
